# Supplementary material
Source: PubMed Central journal article supplement (PMC6942226)
Supplement: NIHMS1541253-supplement-1.pdf [file NIHMS1541253-supplement-1.pdf]

## Supplementary Table Legends

**Table S1. Cherry picker siRNA list and Primer pairs utilized for qRT-PCR.** siRNAs utilized for the differentiation and viability screen (Dharmacon). Primer pairs (forward and reverse) and TaqMan Probes used for qRT-PCR.

**Table S2. siELF4 differentially expressed genes.** All significantly differentially expressed genes following ELF4 knockdown in BE(2)-C cells, grouped by expression (up or down).

**Table S3. Survival analysis of Versteeg and Seeger cohorts.** Results of univariate and multivariate Cox proportional hazards regression analysis for the Versteeg and Seeger cohorts.

**Table S4. PANTHER and mSigDB analysis of siELF4 down- and up-regulated genes.** Results from pathway analysis using siELF4 differentially expressed genes (**Table S3**).

**Table S5. miR-124 target list (mNSC Study and miRTarBase).** miR-124-regulated genes identified from murine Neural Stem Cells were combined with high-confidence targets from miRTarBase.

**Table S6. Overlap between miR-124 targets and siELF4 down-regulated genes.** miR-124 targets (**Table S5**) were compared to siELF4 down-regulated genes (**Table S3**) to identify co-targeted genes.

**Table S7. mSigDB analysis of overlap between miR-124 targets and siELF4 downregulated genes.** Genes that are co-targeted by miR-124 and ELF4 (**Table S6**) were assessed for gene-set enrichment utilizing mSigDB.

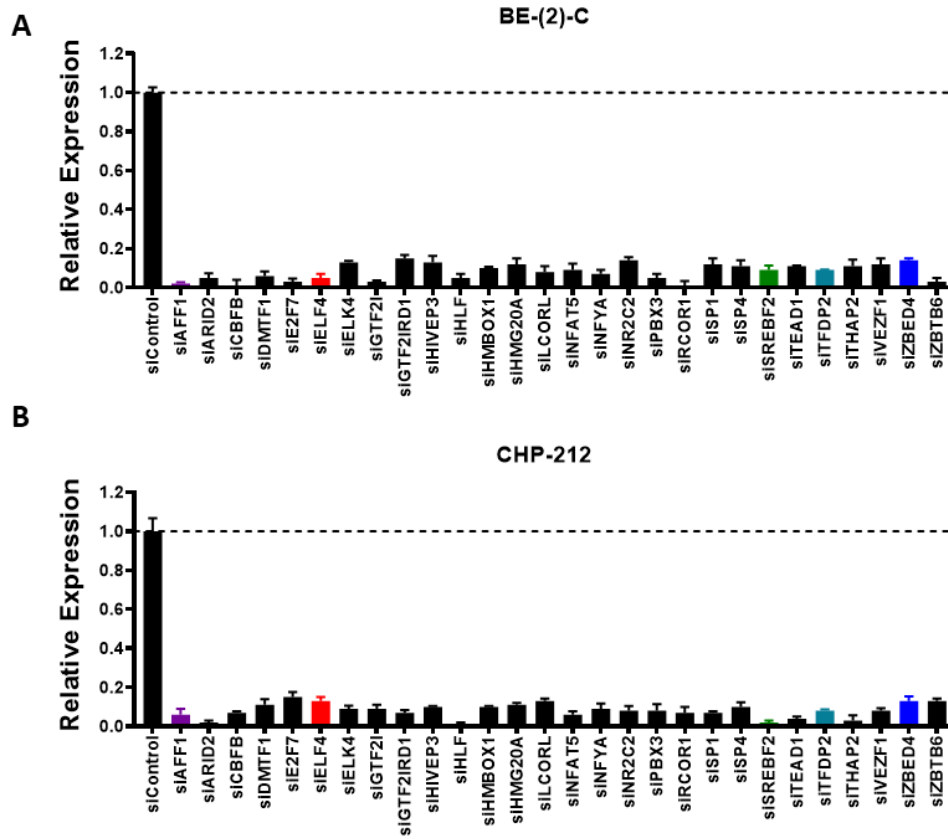

**Figure S1. Knockdown efficiency 48 h after reverse transfection.** BE(2)-C and CHP-212 cells were reverse transfected with siRNAs against each TF. After 48 h, RNA was isolated and qRT-PCR was performed to assess the knockdown efficiency for each siRNA. All knockdowns had a significant change in comparison to siControl based on a Student's t-test with a nominal significance threshold of  $p = 0.05$ .

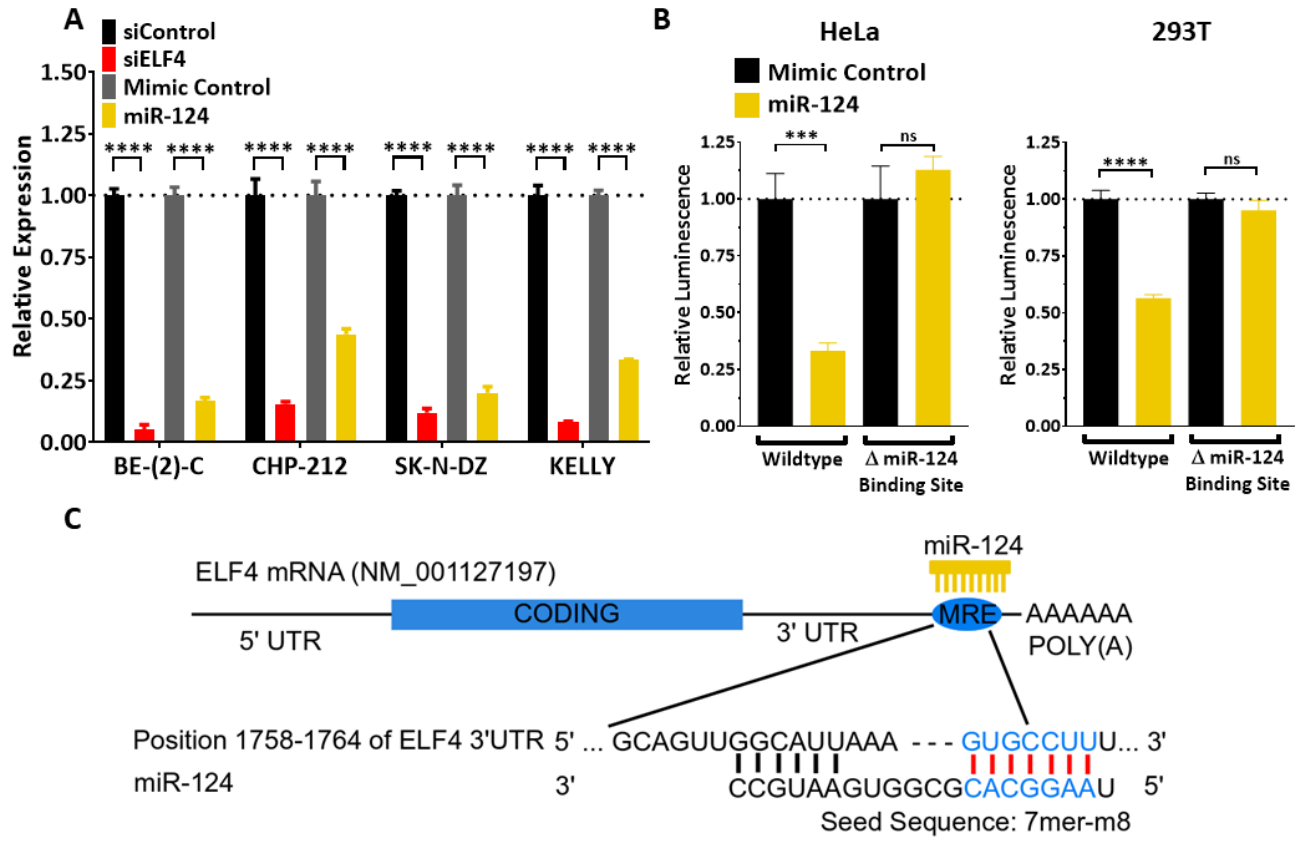

**Figure S2. miR-124 directly binds ELF4 and regulates ELF4 expression. (A)** ELF4 expression levels in BE(2)-C and CHP-212 cells 48 h after transfection. **(B)** HeLa and 293T cells co-transfected with an ELF4 3'UTR luciferase reporter and miRNA mimics. Luminescence was measured after 48 h. **(C)** The miR-124 binding site in ELF4 3'UTR. Statistical significance of observed changes was determined by Student's t test. \* =  $p < 0.05$ , \*\*\* =  $p < 0.001$ , \*\*\*\* =  $p < 0.0001$ .

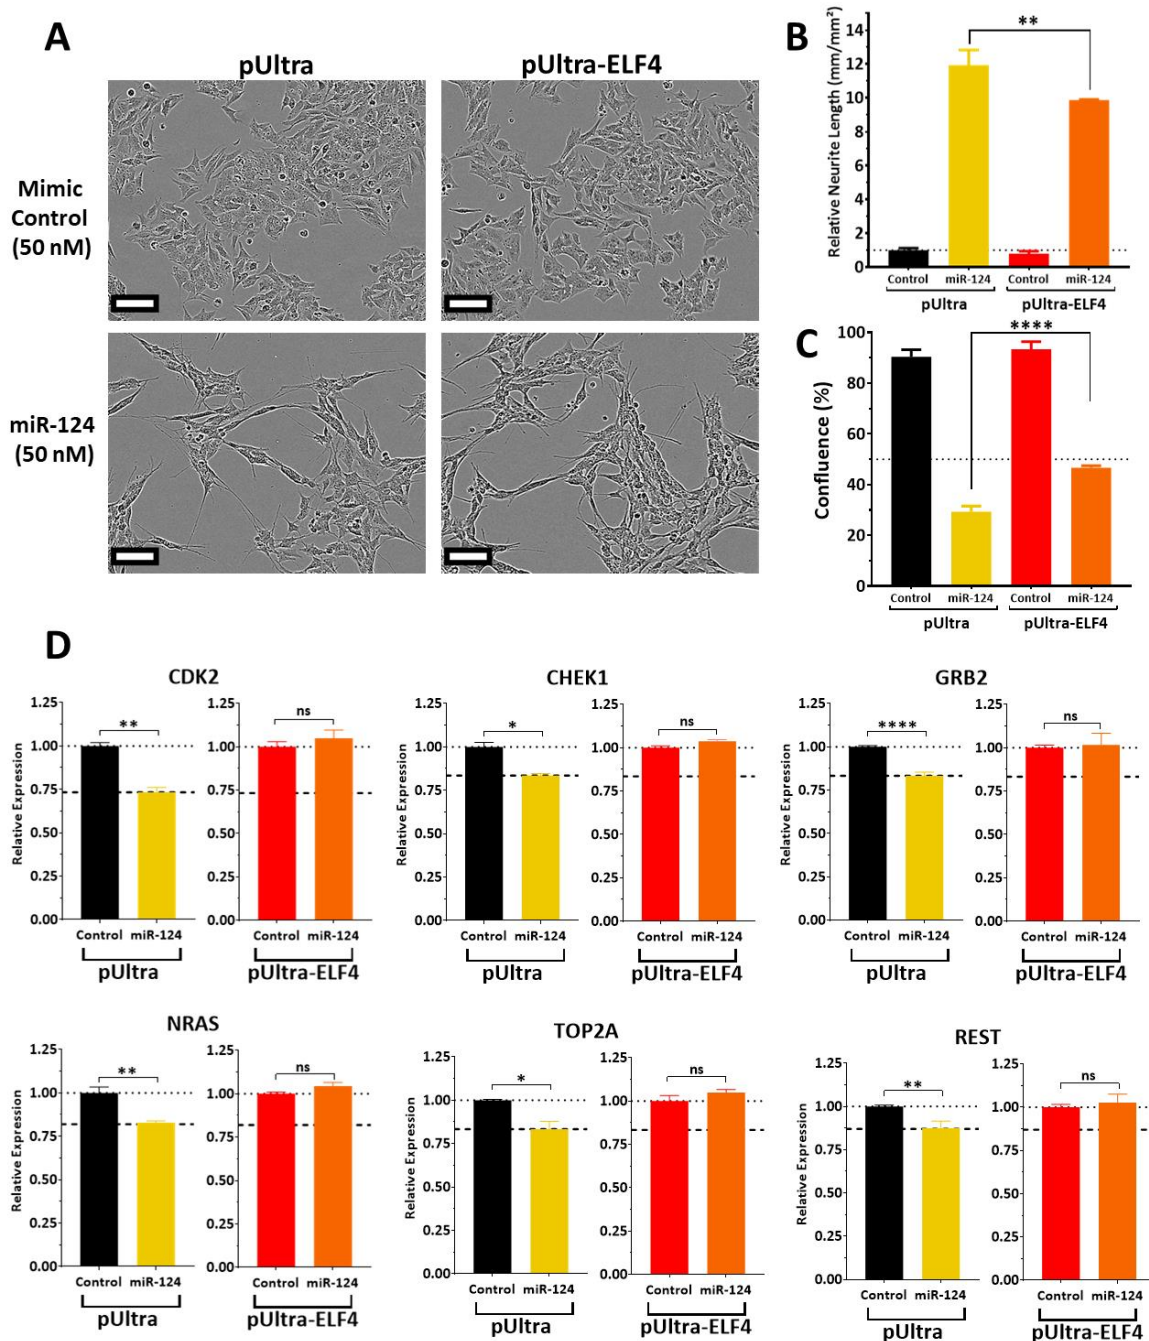

**Figure S3. ELF4 ectopic expression antagonizes the effect of miR-124 on differentiation of KELLY cells.**

**(A)** KELLY cells were first infected with ELF4-expressing lentivirus or control then reverse transfected with miRNA mimics (miR-124 or control). 120 hours later, the impact on differentiation and confluence was measured. **(A)** Morphology of transfected cells (scale bar = 100  $\mu$ m). **(B)** Quantification of neurite outgrowth of treated cells. **(C)** Confluence of treated cells. **(D)** Control and ELF4-overexpressing cells were transfected with miRNA mimics; 48 hours later RNA was isolated and qRT-PCR was used to measure expression of a select group of co-targeted genes. Statistical significance of observed changes in neurite outgrowth was determined by a two-way ANOVA with Tukey's range test for multiple comparisons. A Student's t-test was used to assess differences in expression. \* =  $p < 0.05$ , \*\*\*\* =  $p < 0.0001$ .

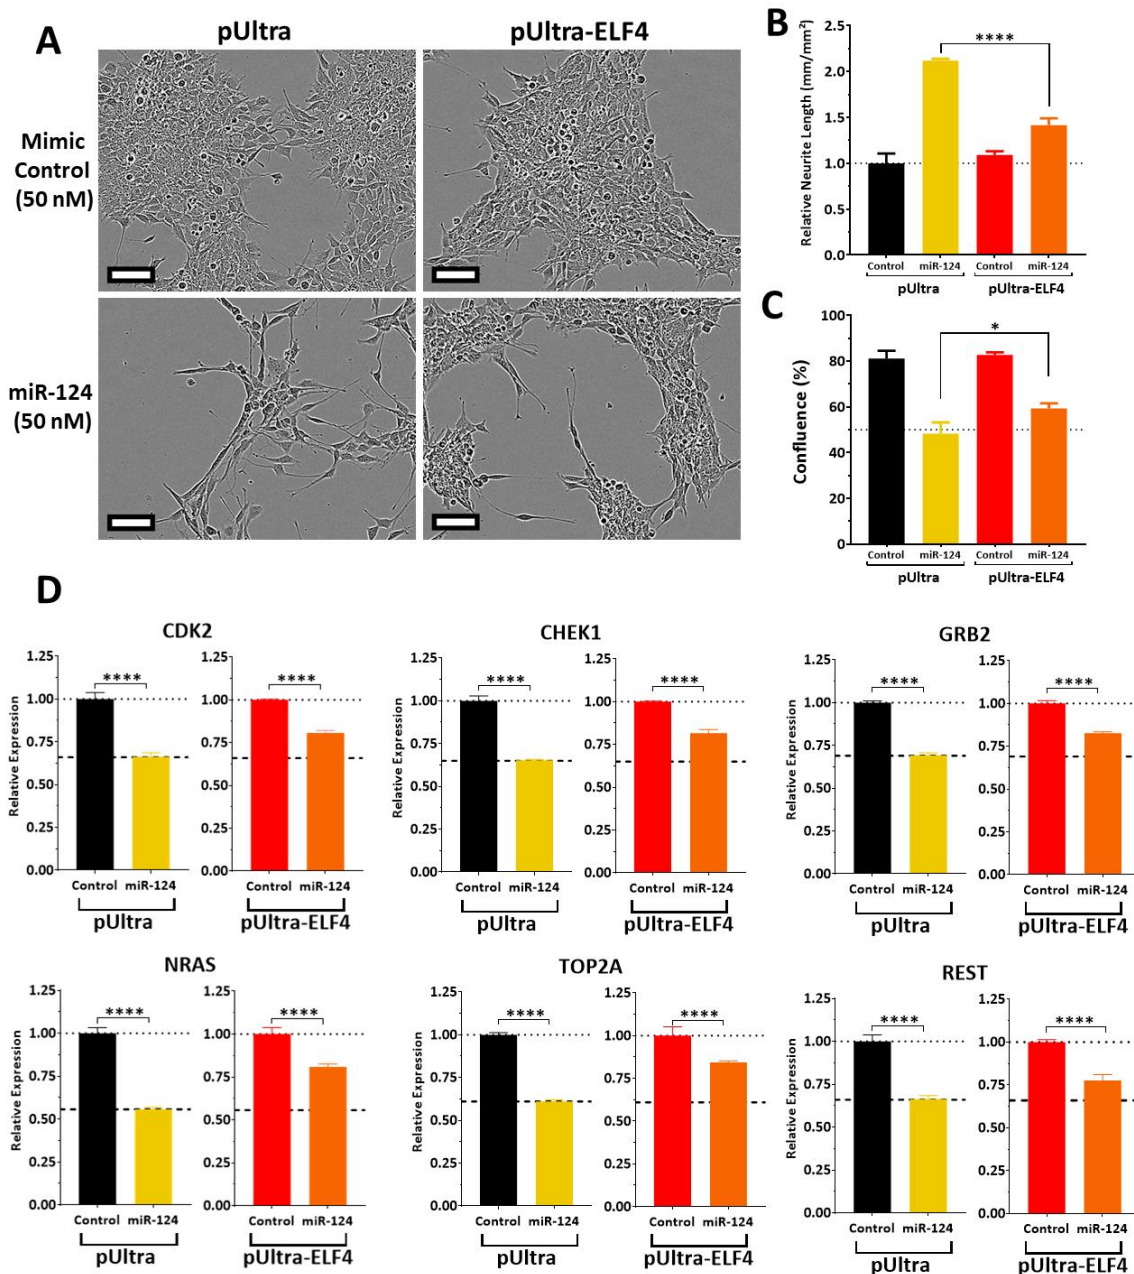

**Figure S4. ELF4 ectopic expression antagonizes the effect of miR-124 on differentiation of SK-N-DZ cells.** SK-N-DZ cells were first infected with ELF4-expressing lentivirus or control then reverse transfected with miRNA mimics (miR-124 or control). 120 hours later, the impact on differentiation and confluence was measured. **(A)** Morphology of transfected cells (scale bar = 100  $\mu$ m); **(B)** Quantification of neurite outgrowth of treated cells. **(C)** Confluence of treated cells. **(D)** Control and ELF4-overexpressing cells were transfected with miRNA mimics; 48 hours later RNA was isolated, and qRT-PCR was used to measure expression of a select group of co-targeted genes. Statistical significance of observed changes in neurite outgrowth was determined by a two-way ANOVA with Tukey's range test for multiple comparisons. A Student's t-test was used to assess differences in expression. \* =  $p < 0.05$ , \*\*\*\* =  $p < 0.0001$ .

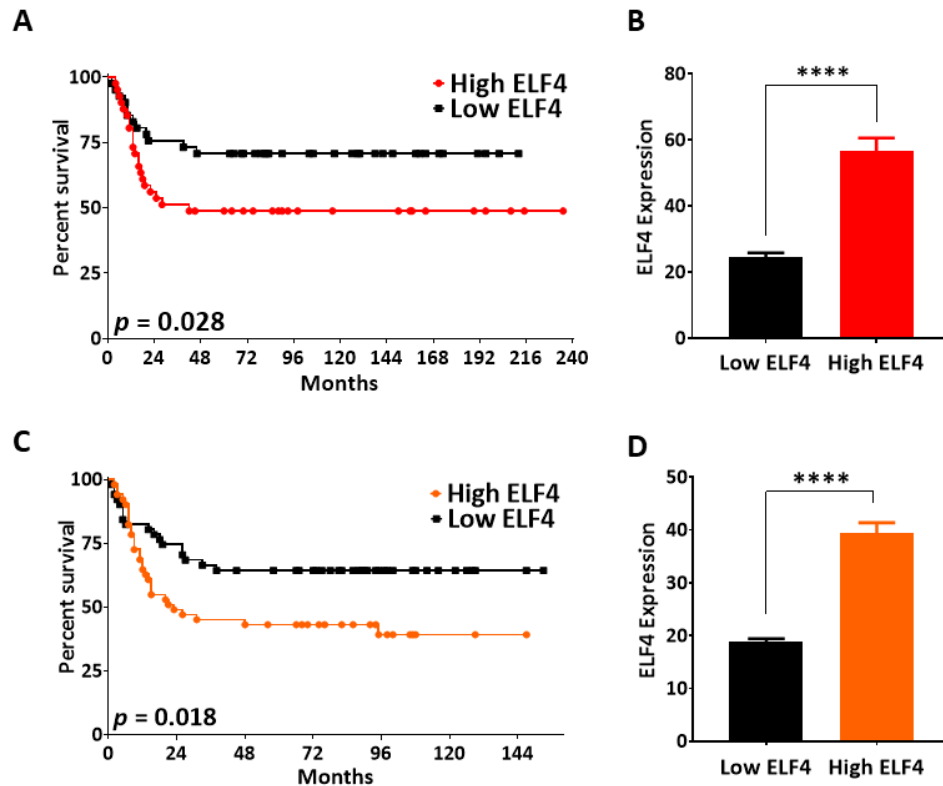

**Figure S5. High ELF4 expression correlates with poor prognosis of neuroblastoma patients. (A)** Overall survival (OS) of neuroblastoma patients from the Versteeg cohort stratified by ELF4 expression. **(B)** ELF4 expression levels (untransformed) in high and low groups. **(C)** Relapse-free survival for the Seeger cohort consisting of high-risk, non-amplified-MYCN neuroblastoma patients. Patients were stratified groups based on median ELF4 expression (untransformed). **(D)** ELF4 expression levels in the high and low groups. Survival analysis was performed using the log-rank (Mantel-Cox) test implemented in GraphPad Prism. Statistical significance of observed changes between the groups was determined by Student's t test. \*\*\*\* =  $p < 0.0001$ .

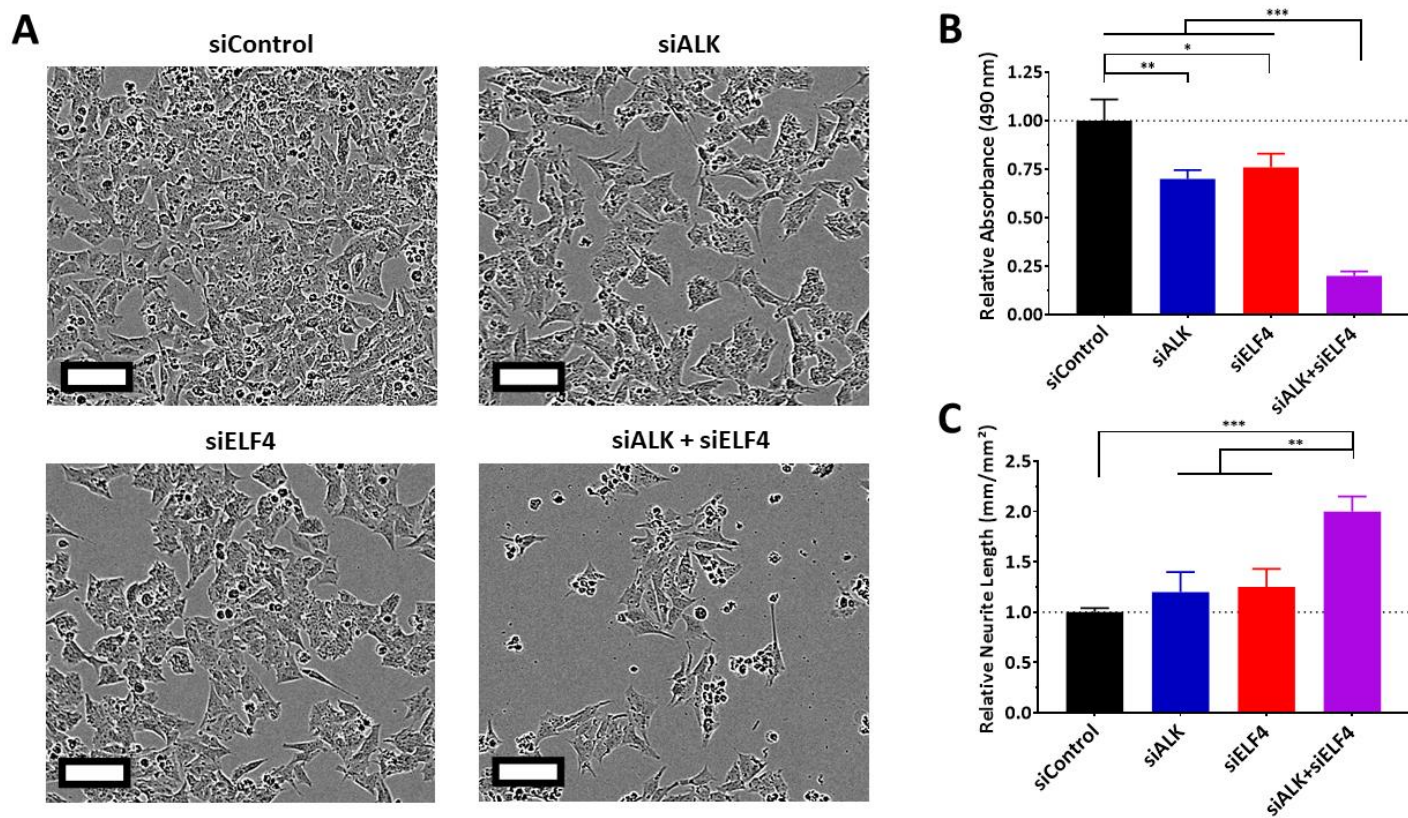

**Figure S6. Synergistic effect of ALK and ELF4 inhibition on differentiation and proliferation of KELLY cells.** (A-C) KELLY cells were reverse transfected with siRNAs (siALK, siELF4 and control). After 120 h: (A) Morphology was observed (scale bar = 100  $\mu$ m); (B) Numbers of viable cells were assessed; and (C) Neurite length was measured. Statistical significance of observed changes was determined by Student's t test with a nominal threshold for significance of  $p = 0.05$ . \* =  $p < 0.05$ , \*\* =  $p < 0.01$ , \*\*\* =  $p < 0.001$ .

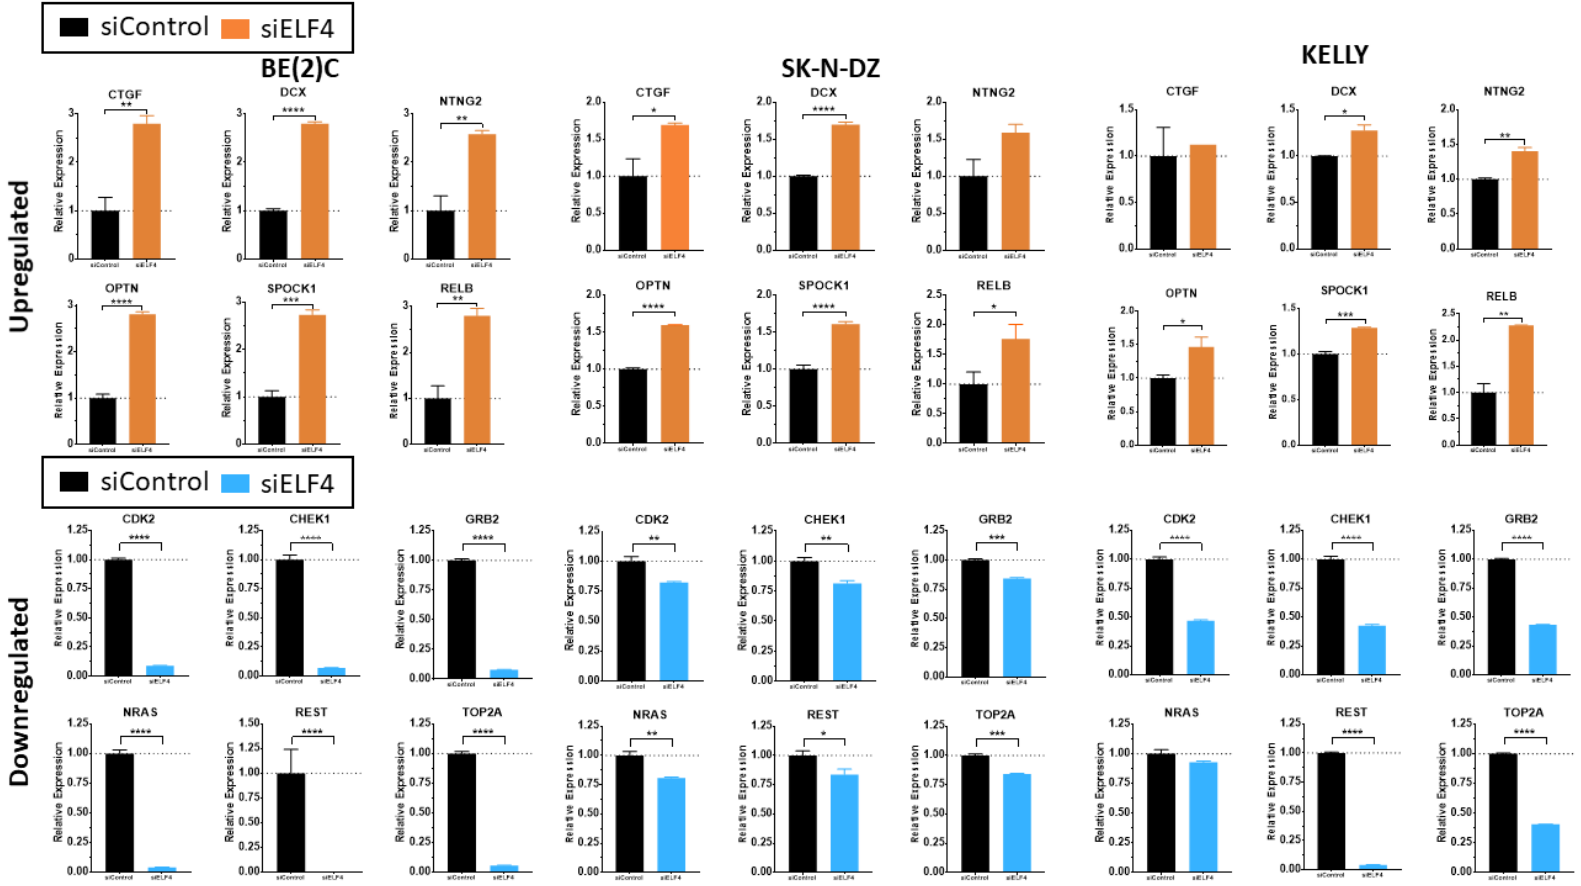

**Figure S7. Validation of RNA-seq Results.** (A-C) A group of downregulated genes identified in the RNA-seq analysis was validated by qRT-PCR in SK-N-BE(2)-C, SK-N-DZ, and KELLY cells 48 hours after reverse transfection with either siControl or siELF4. (D-E) A group of upregulated genes identified in the RNA-seq analysis was validated by qRT-PCR in the same cell lines following knockdown. Statistical significance of observed changes was determined by Student's t-test with a nominal threshold for significance of  $p = 0.05$ . \* =  $p < 0.05$ , \*\* =  $p < 0.01$ , \*\*\* =  $p < 0.001$ , \*\*\*\* =  $p < 0.0001$ .
